# Supplementary material
Source: PubMed Central journal article supplement (PMC5558438)
Supplement: NIHMS891797-supplement-supplement_1.pdf [file NIHMS891797-supplement-supplement_1.pdf]

# Supplementary

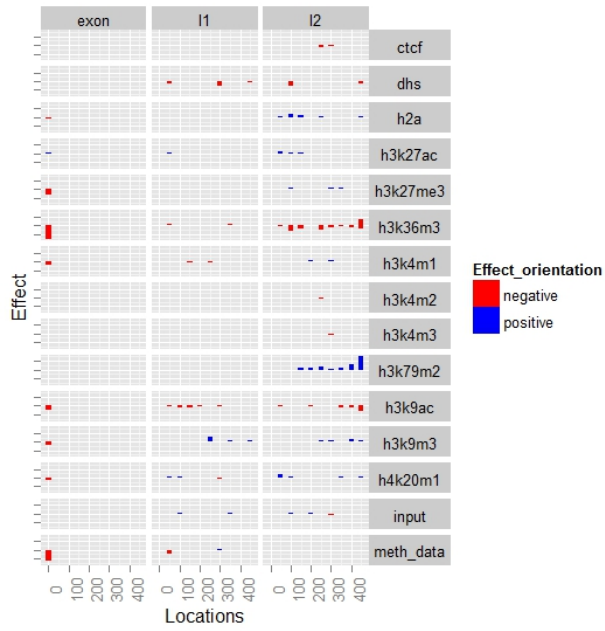

Figure S1: The effect size of chromatin features at different genome location in GM12878.

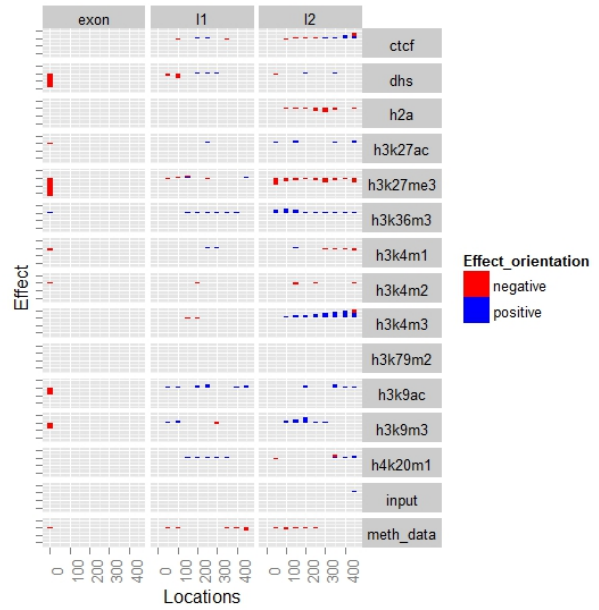

Figure S2: The effect size of chromatin features at different genome location in K562.

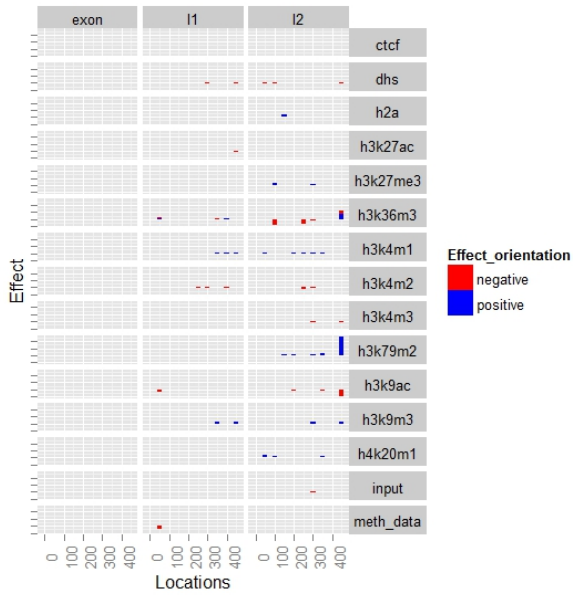

Figure S3: The relevance of chromatin features at different genome location in GM12878.

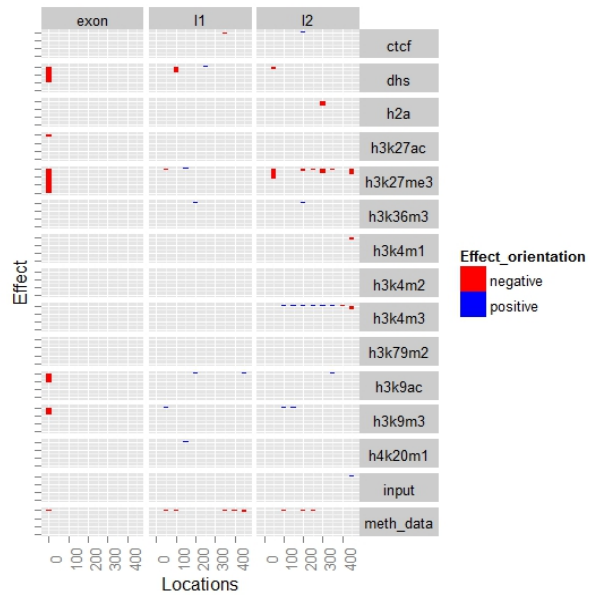

Figure S4: The relevance of chromatin features at different genome location in K562.
